1 ***Fasciola hepatica* fatty acid binding protein (Fh12) induces apoptosis and**  
2 **tolerogenic properties in murine bone marrow derived dendritic cells**

3  
4

5 **Running Head:** *F. hepatica* FABP induces apoptosis of murine DCs

6

7 Caleb Ruiz-Jiménez<sup>a</sup>, Daiana P. Celiás<sup>b</sup>, Bianca Valdés<sup>c</sup>, Willy D. Ramos-Pérez, Laura  
8 Cervi<sup>b\*</sup>#, Ana M. Espino<sup>a\*#</sup>

9

10 LC and AME equally contributed to this work

11

12 <sup>a</sup>Laboratory of Immunology and Molecular Parasitology, Department of Microbiology,  
13 University of Puerto Rico, School of Medicine, San Juan, Puerto Rico.

14 <sup>b</sup>Department of Clinical Biochemistry, Faculty of Chemical Sciences, National University  
15 of Cordoba, Argentina.

16 <sup>c</sup>Department of Biology, University of Puerto Rico, Rio Piedras Campus, San Juan,  
17 Puerto Rico.

18

19 #Address correspondence to Espino, A.M. [ana.espinol@upr.edu](mailto:ana.espinol@upr.edu)

20 Present address: Laboratory of Immunology and Molecular Parasitology, Department of  
21 Microbiology, University of Puerto Rico, School of Medicine. PO BOX 365067, San  
22 Juan, PR 00936-5067.

23

24 **ABSTRACT**

25

26 In a previous study we demonstrated that *Fasciola hepatica* fatty acid binding protein  
27 (Fh12) significantly suppress macrophage function by inhibiting IL-6, IL-1B, tumor  
28 necrosis factor (TNF) and IL-12 production in TLR4-stimulated murine macrophages, an  
29 effect mediated through the signaling of CD14 co-receptor without affecting the viability  
30 of these cells. Given that dendritic cells (DCs) are immune cells that play a central role in  
31 the initiation of primary immune responses and that are the only antigen-presenting cells  
32 capable of stimulating naive T-cells, in the present study we investigated the effect of  
33 Fh12 on DCs. We found that Fh12 exerts a strong suppressive effect on activation and  
34 function of DCs. However, in contrast to the effect observed on macrophages, Fh12  
35 induces early and late apoptosis of DCs being this phenomenon dose-dependent and  
36 CD14-coreceptor independent. At low concentration Fh12 modulates the LPS-induced  
37 DCs maturation status by suppressing the MHC-II, and co-stimulatory molecules CD40  
38 and CD80 surface expression together with the pro-inflammatory cytokines IL-12p70 and  
39 IL-6 production whereas increase the IL-10 levels. Besides, Fh12 decreased the ability of  
40 LPS-activated DCs to induce IFN $\gamma$  production against allogeneic splenocytes, while  
41 increasing IL-4 production. We have described for the first time the ability of Fh12 to  
42 modify selectively the viability of DCs by apoptosis induction. The selective diminution  
43 in DCs survival could be a *F. hepatica* strategy in order to prevent a host immune  
44 response during the earliest phases of infection.

45

46

47

## 48 INTRODUCTION

49 *Fasciola hepatica* is a helminth parasite that causes fascioliasis, a chronic disease that  
50 affects around 17 million people worldwide. Fascioliasis also leads to economic losses in  
51 livestock, estimated in more than \$3 billion annually (Mas-Coma et al., 2005). The  
52 survival of helminths in the host over long periods of time is the result of a dynamic co-  
53 evolution that results in a predominant Th2/Treg immune response that is only achieved  
54 by suppressing the Th1-inflammatory response (Donnelly et al., 2008; O'Neill et al.,  
55 2001). Excretory-secretory products (ESPs) and tegumental antigens (FhTeg), which are  
56 a complex mixture of antigens, have been largely implicated as responsible for the  
57 immune modulation (Anuracpreeda et al., 2006; Brady et al., 1999; Donnelly et al., 2008).  
58 These antigens exert a strong influence on the activation status and function of the  
59 antigen-presenting cells (APCs) at the early stages of infection. In this regard, ESPs and  
60 FhTeg have shown to induce alternative activation of macrophages (Adams et al., 2014;  
61 Donnelly et al., 2005; Flynn et al., 2007) and partial activation of dendritic cells (DCs)  
62 (Hamilton et al., 2009). Moreover, ESPs have also shown to induce apoptosis of  
63 eosinophils (Serradell et al., 2007) and macrophages (Guasconi et al., 2012) during the  
64 early stages of parasite infection likely as a mechanism to prevent pro-inflammatory  
65 functions of these cells (Adam-Klages et al., 2005).

66 We have demonstrated that *F. hepatica* fatty acid binding protein (FABP), an antioxidant  
67 molecule with essential functions for parasite metabolism and that has been many times  
68 identified in the FhTeg and ESPs (Hacariz et al., 2012; Morphew et al., 2012; Wilson et  
69 al., 2011), possesses powerful anti-inflammatory functions. Native (Fh12) and  
70 recombinant (Fh15) variants of FABP have shown to significantly suppress the

71 production of IL-1 $\beta$  and TNF from bone-marrow derived macrophages (BMDM)  
72 stimulated with LPS *in vitro* via toll-like receptor-4 (TLR4) (Martin et al., 2015; Ramos-  
73 Benitez et al., 2017). FABP exerts this effect by suppressing the expression of the CD14-  
74 coreceptor and the phosphorylation of various kinases downstream TLR4 signaling  
75 cascade (Martin et al., 2015). Moreover, Fh12 has also shown to significantly suppress a  
76 large number of pro-inflammatory cytokines in a mouse model of septic shock. Also, to  
77 impair the murine BMDM function by inhibiting their phagocytic capacity without  
78 provoking any toxic or apoptotic effect on these cells (Martin et al., 2015).

79 In the present study we focus on studying the effect of Fh12 on activation and  
80 functionality of DCs, which play a relevant role during the initiation of immune response  
81 in the recognition of helminth or their products and the subsequent promotion of Th2/  
82 Treg development. In contrast to the effect observed on macrophages, we found that Fh12  
83 modulate the activation and function of DCs by promoting the early and late apoptosis.  
84 The apoptotic effect of Fh12 on DCs was found to be dose-dependent and not mediated  
85 by the CD14-coreceptor. Concurrently, we demonstrated that F12 is capable of inducing  
86 regulatory features on LPS-activated DCs, thereby impairing their capacity to prime  
87 naïve T-cells thus, inducing a phenotype able to promote the development of anti-  
88 inflammatory responses.

89

## 90 **MATERIALS AND METHODS**

91

### 92 **Animals**

93 Six- to 8-week-old inbred female C57BL/6 and BALB/c mice were indistinctly purchased  
94 from Charles River Laboratory (Wilmington, MA) or from the Faculty of Veterinary

95 Sciences, National University of Litoral (UNL, Argentina). B6.129S4 CD14 knockout  
96 (CD14KO) female mice (C57BL/6 background), 6–8-week-old, were purchased from  
97 Jackson Laboratory (Bar Harbor, ME). The animal studies were performed at the Animal  
98 Resources Center of the Medical Sciences Campus, University of Puerto Rico in  
99 accordance with guidelines and protocols approved by the Ethics Institutional Animal  
100 Care and Use Committee (MSC-IACUC, Protocol No. 7870215) and Faculty of Chemical  
101 Sciences, National University of Córdoba (Approval Number HCD 1637) in strict  
102 accordance with the recommendation of the Guide to the Care and Use of Experimental  
103 Animals published by the Canadian Council on Animal Care (OLAW Assurance number  
104 A5802-01).

105

#### 106 **Fh12 Purification**

107 Fh12 was purified from a whole-fluke extract of adult *F. hepatica* using as previously  
108 described (Espino et al., 2001). Briefly, whole fluke extract was first subjected to  
109 ultracentrifugation at 30,000 g followed by gel filtration chromatography with Sephadex  
110 G-50 (XK 26/1000 column). Fractions containing proteins in the range of 1.5-30kDa  
111 were collected, pooled and subjected to two consecutive preparative isoelectric focusing  
112 (IEF) at pH 3-10 (first separation) and pH 5-7 (second separation) using a Rotofor Cell  
113 (Bio-Rad). The individual IEF fractions were harvested, and their pH value and OD 280  
114 nm determined. Each aliquot was subjected to SDS-PAGE and the proteins were  
115 visualized by coomassie blue. Fractions from the second IEF run that exhibited a single  
116 polypeptide band of around 12-15kDa were manually excised from the gel, washed twice  
117 with double-distilled water, digested with sequencing-grade trypsin (Promega, Madison,

118 WI) and analyzed by MALDI and MS/MS as previously described (Morales and Espino,  
 119 2012). After confirming the presence of Fh12-FABP as a unique component, these  
 120 fractions were pooled (**Fig-1S**).

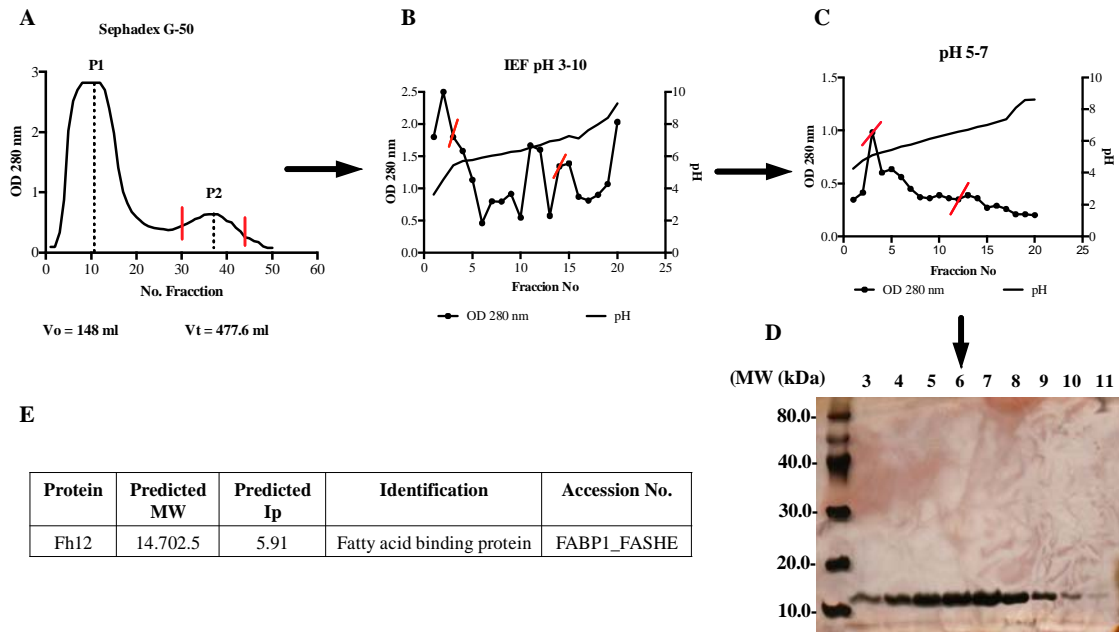

**Figure-1S. Purification of native *F. hepatica* fatty acid binding protein (Fh12).** (A) *F. hepatica* whole worm extract was loaded onto a gel filtration chromatography with Sephadex G-50 (XK 26/100 column). Fractions eluted in peak-2 (P2) containing proteins among 1.5 to 30kDa were pooled. (B-C) P2 was dialyzed against 1% glycine containing 2% ampholytes pH 3-10 (first run) or pH 5-7 (second run) and then loaded onto a liquid isoelectric focusing system (Rotofor, Bio-Rad). Individual fractions were harvested and their pH and absorbance at 280nm were measured. Red lines on figures indicate fractions that were selected for pooling and subsequent purification step. (D) Fractions 3 to 11 from the IEF run with pH 5-7, which contain proteins with Ip between 4.61 to 5.9 were analyzed by 15% SDS-PAGE stained with silver stain to corroborate the presence of polypeptide of 12kDa. (E) Polypeptide band was excised from gel and analyzed by matrix-assisted laser desorption ionization 9MALDI and tandem mass spectrometry (MS/MS). Analysis revealed the presence of fatty acid binding protein.

121

## 122 Endotoxin removal

123 Endotoxins were removed from the Fh12 by using the polymyxin-B (PMB) column  
 124 according to the manufacturer's instructions, and the levels of endotoxins were measured  
 125 using the Chromogenic *Limulus* Amebocyte Lysate QCL-1000 Assay (Lonza,  
 126 Walkersville, MD). Fh12 was considered endotoxin free when endotoxin levels gave  
 127 similar to background levels (<0.1 EU/ml). Protein concentration was adjusted to 1  
 128 mg/ml as determined by the bicinchoninic acid (BCA) method using a Pierce protein  
 129 assay kit (Pierce, Cambridge, NJ).

### 130 **Myeloid DC generation and stimulation**

131 DCs were generated as previously described (Falcon et al., 2010), with slight  
132 modifications. Briefly, bone marrow was collected from femurs and tibia of BALB/c  
133 mice and then seeded into bacteriological Petri dishes at  $4 \times 10^6$  in 10 ml of complete  
134 RPMI 1640 medium supplemented with 2mM L-glutamine (Life Technologies,  
135 Gaithersburg, MD), 100U/ml penicillin and 100 $\mu$ g/ml streptomycin, 10% heat-inactivated  
136 endotoxin-free fetal calf serum (Sigma-Aldrich) and 20ng/ml GM-CSF (R&D System) at  
137 37°C, 5% CO<sub>2</sub>. On day 3, an additional 10 ml of medium containing 20ng/ml GM-CSF  
138 was added. At day 6, 10 ml of culture supernatant was removed and replaced with fresh  
139 culture medium containing GM-CSF. On day 8, the supernatant was removed and  
140 replaced with medium without GM-CSF, and cells were harvested 18h later (day 9). After  
141 this time, >85% of harvested cells were DCs (MHC class II<sup>+</sup>, CD11c<sup>+</sup>). For stimulation  
142 experiments, DCs were seeded into 96-wells plates at  $4 \times 10^5$  cells in complete RPMI. DCs  
143 were treated for 18h with Fh12 (2.5 $\mu$ g/ml or 1 $\mu$ g/ml LPS (*E. coli* 0111: B4; Sigma-  
144 Aldrich). In the inhibition experiments, DCs were treated for 1h with Fh12 (2.5 $\mu$ g/ml)  
145 and further stimulated with LPS (1 $\mu$ g/ml). Cells treated with PBS were used as controls  
146 in both experiments. Supernatants from cultured DCs were tested for the production of  
147 IL-10, IL-12p70 (eBioscience, USA) and IL-6 (BD Pharmingen, USA) by sandwich  
148 ELISA.

149

### 150 **Cell viability and Annexin-V and 7AAD assay**

151 DCs treated with Fh12 (2.5, 5, 10 and 15  $\mu$ g/ml) in the presence or absence of LPS  
152 (1 $\mu$ g/ml) was incubated with 50 $\mu$ l MTT (sodium 3'-[1-(phenylaminocarbonyl)-3,4-

153 tetrazolium]-bis (4- methoxy-6-nitro) benzene sulfonic acid hydrate) labeling reagent  
154 (Roche Life Science, USA) to each well. The absorbance was read at 480 nm. The  
155 percentage of viable, necrotic, and apoptotic DCs after treatments were determined by  
156 flow cytometry using surface Annexin V detection and 7-Amino-actinomycin D (7-AAD)  
157 incorporation (BD Biosciences, USA). DCs were washed with PBS, and then washed  
158 twice with annexin-V binding buffer (10mM HEPES, 140 mM NaCl, 2.5 mM CaCl, pH  
159 7.4) and resuspended in 100µl of annexin-V binding buffer before being incubated with  
160 FITC-conjugated annexin-V (0.5µg /  $2 \times 10^5$  cells) and 0.5µl (7-AAD) solution. After 15  
161 min of incubation at room temperature (RT) in the dark, an extra amount of 400µl of  
162 annexin-V binding buffer was added to cells, and cells were analyzed by flow cytometry.  
163 DCs were gated on the basis of their forward and side light scatter. If there is an alteration  
164 in the membrane integrity (due to externalization of phosphatidylserine), annexin-V  
165 detects both early- and late- apoptotic cells. Thus, the simultaneous addition of 7-AAD,  
166 which does not enter healthy cells with an intact plasma membrane, discriminates  
167 between early apoptotic (annexin V-positive and 7AAD-negative), late-apoptotic (both  
168 annexin V- and 7AAD-positive), necrotic (annexin V-negative and 7AAD-positive) and  
169 live (both annexin V- and 7AAD-negative) cells (Ardestani et al., 2012).

170

### 171 **DCs Flow Cytometry**

172 Expression of cell surface markers on DCs treated as described above was quantified by  
173 two-color flow cytometry using allophycocyanin-, and phycoerythrin-conjugated  
174 antibodies specific for CD80, CD40, MHC-II, and CD11c (BD BioSciences).  
175 Appropriate labeled isotype-matched antibodies were used as controls. Cell acquisition



176 was performed using FACS Calibur equipment and MACSQuant Analyzer - Miltenyi  
177 equipment, whereas analysis of results was performed using FlowJo software (FlowJo,  
178 LLC).

179

### 180 **Allogeneic mixed lymphocyte reaction (MLR)**

181 DCs from BALB/c mice were previously treated with Fh12 (2.5µg/ml), LPS (1µg/ml), or  
182 for 1h with Fh12 (2.5µg/ml) and further stimulated with LPS (1µg/ml) for 18h. Then the  
183 cells were cultured in U-bottom 96-well plates with C57BL/6 splenocytes  
184 ( $2 \times 10^5$  cells/well) for 5 days at a ratio of 5:1. For cytokine determination, supernatants  
185 were collected after 48h for IFN- $\gamma$ , and 72h for IL-4 and IL-13 detection.

### 186 **Statistical analysis**

187 All experiments were repeated twice with in different days with three replicates for each  
188 determination, and equivalent results were obtained. Data are expressed as mean  $\pm$   
189 standard error of the mean (S.E.M.) and analyzed statistically using the Student *t*-test.  
190 Comparisons of the values for multiple groups were made using one-way ANOVA.  
191 Statistical analyses were made using GraphPad Prism software (Prism-6). Statistical  
192 significance was assumed at the *p*-value of  $<0.05$ .

193

194

## 195 **RESULTS**

196

197

### 198 **Fh12 induce apoptosis of myeloid DCs**

199 Given in our previous studies we had demonstrated that the treatment of murine  
200 macrophages with different concentrations of Fh12 alone or combined with LPS  
201 suppressed the capacity of these cells to express pro-inflammatory mediators without

202 affecting the cell viability (Martin et al., 2015); in the present study, we determined  
203 whether Fh12 could exert a similar effect on DCs. For this, bone marrow derived DCs  
204 were treated for 18h with different concentrations of Fh12 or with Fh12 for 1h and further  
205 stimulated with LPS. Results of the MTT-viability test revealed that the treatment of DCs  
206 with low Fh12 concentrations (among 2.5 to 5 $\mu$ g/ml) alone or combined with LPS seems  
207 to maintain the viability of cells as compared with those cells treated only with PBS or  
208 LPS alone. However, at Fh12 concentrations of 10 and 15 $\mu$ g/ml, the absorbance values  
209 significantly dropped, which indicates that at these Fh12 concentrations, the viability of  
210 cells was seriously compromised ( $p<0.0001$ ) (**Fig. 1**). To determine whether Fh12 could  
211 be inducing apoptosis, Fh12-treated DCs were stained with annexin-V and 7AAD and  
212 analyzed by flow cytometry. Results demonstrated that ~91% of cells remain viable when  
213 are treated with medium alone for 18h. However, when cells are treated with Fh12 the  
214 viability of cells drop significantly. At Fh12 concentrations of 2.5 or 5 $\mu$ g/ml ~ 52% and  
215 41.9% of DCs remained viable, whereas that 46.5% (23.6% early apoptosis and 22.9%  
216 late apoptosis) and 52.9% (18.8% early apoptosis and 34.1% late apoptosis) was in  
217 apoptosis, respectively. The number of apoptotic cells increased significantly by 80.7%  
218 (22.1% early apoptosis and 58.6% late apoptosis) and 88.7% (18.3% early apoptosis and  
219 70.4% late apoptosis) when the Fh12 concentration increased to 10 $\mu$ g/ml and 15 $\mu$ g/ml,  
220 respectively (**Fig. 2**). These results clearly demonstrate that Fh12 promotes the late  
221 apoptosis of DCs in a dose-dependent manner.

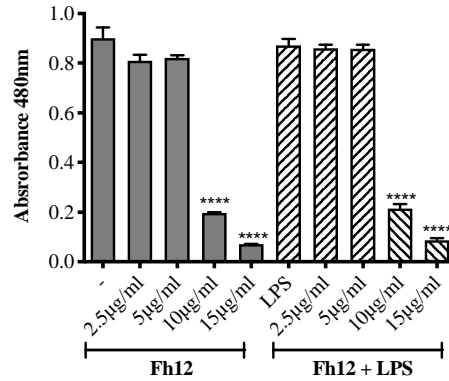

**Figure-1. MTT-viability assay of Fh12 treated DCs.** Murine DCs were seeded into 96-wells plates at  $4 \times 10^5$  cells in complete RPMI plus 20ng/ml GM-CSF and then treated with Fh12 (2.5, 5, 10, 15 µg/ml) in the presence or absence of 1 µg/ml LPS (*E. coli* 0111:B4). Control cells were treated with Fh12 or LPS alone. After 18h of incubation at 37C, 5% CO<sub>2</sub> 50 µl MTT (sodium 3'-[1-(phenylaminocarbonyl)-3,4-tetrazolium]-bis (4- methoxy-6-nitro) benzene sulfonic acid hydrate) labeling reagent was added to each well and the absorbance was read at 480 nm. Viability of cells significantly dropped (\*\*\*\*  $p < 0.0001$ ) at Fh12 concentrations  $\geq 10$  µg/ml.

222

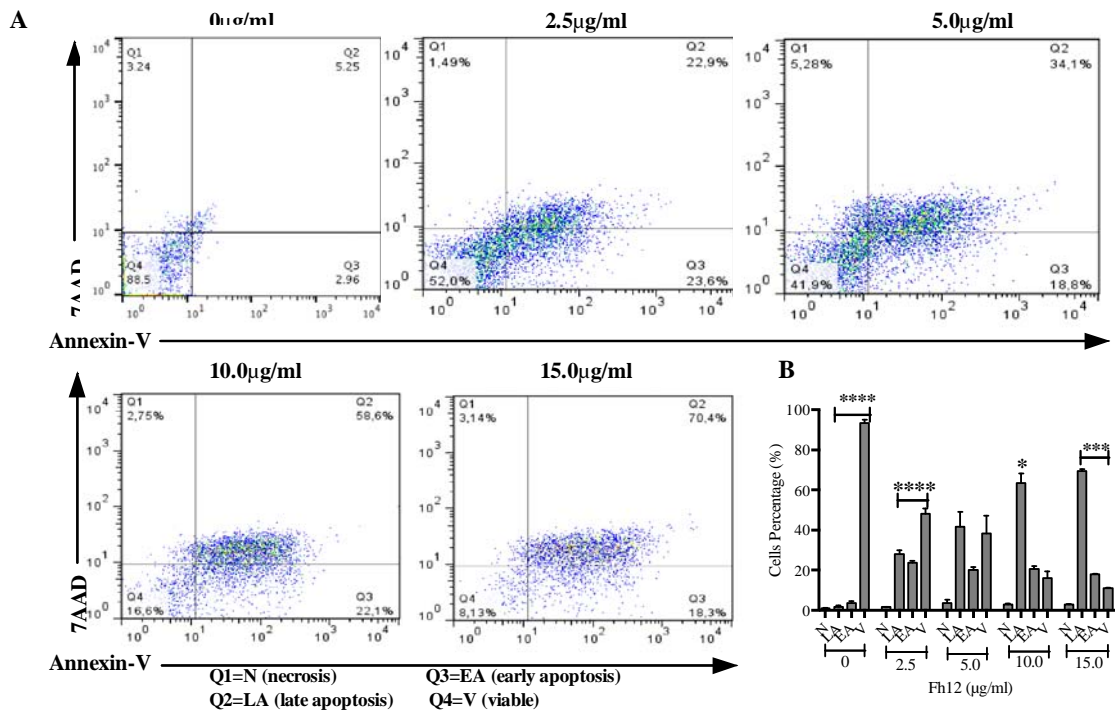

**Figure-2. Fh12 induces apoptosis of DCs, as measured by Annexin-V binding to externalized phosphatidylserine.** Myeloid DCs from C57BL/6 mice were treated with Fh12 (2.5, 5, 10, and 15 µg/ml) or remain untreated for 18 hours. After incubation, the cells were harvested and analyzed by two-color flow cytometry for Annexin V and 7-AAD. Cells were gated based on the CD11c expression. (A) Histogram representative of an experiment showing that the apoptosis of DCs induced by Fh12 is dose-dependent. (B) Average percentages and their SEM of at least three independent experiments showing that the percentage of DCs viable (V) at Fh12 concentration of 2.5 µg/ml is significantly high (\*\*\*\* $p < 0.0001$ ) compared to the percentage of cells in early (EA) or late apoptosis (LA). In contrast, the percentage of DCs in apoptosis significantly increased at Fh12 concentration of 10 µg/ml. (\* $p = 0.0146$ ) and 15 µg/ml (\*\* $p < 0.0008$ ).

223

224

225 **Fh12 induces apoptosis of DCs in absence of CD14 co-receptor**

226 Since in our previous studies with murine macrophages we had demonstrated that Fh12  
227 targeted the CD14 coreceptor as a mechanism to suppress the expression of pro-  
228 inflammatory cytokines and prevent the phagocytic capacity of macrophages (Martin et  
229 al., 2015), and given that CD14 has been involved in the regulation of programmed cell  
230 death (apoptosis) in immune and no-immune cells (Frey and Finlay, 1998; Heidenreich et  
231 al., 1997), we investigate whether Fh12 could require CD14 to induce apoptosis of DCs.  
232 Myeloid DCs were collected from CD14 KO mice and fully differentiated *in vitro*.  
233 Further, cells were cultured and treated with 15µg/ml Fh12. Results demonstrated that in  
234 the absence of CD14 Fh12 induces similar apoptosis levels that those observed in DCs of  
235 wild type animals (more than 70% **Fig. 3**). This result indicates that CD14 signaling is  
236 not involved in the apoptosis mechanism induced by Fh12.

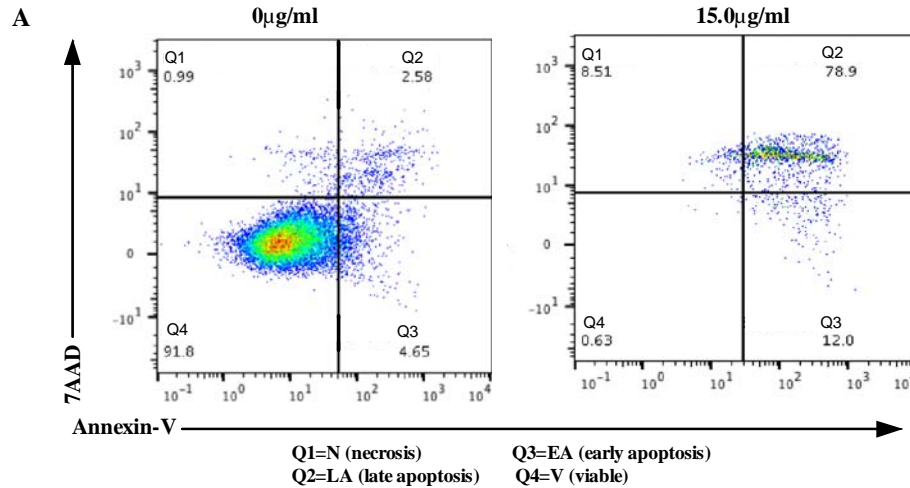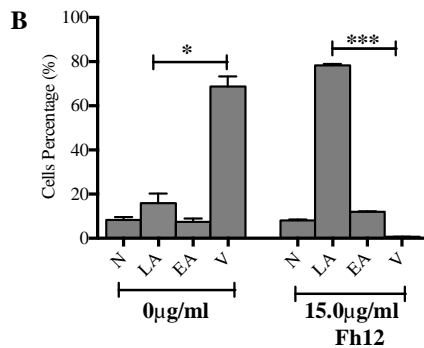

**Figure-3. Fh12 induces apoptosis of DCs in absence of CD14 coreceptor.** Myeloid DCs from CD14 KO C57BL/6 mice were treated with Fh12 (15µg/ml) for 18 hours or remain untreated. After incubation, the cells were harvested and analyzed by two-color flow cytometry for Annexin V and 7-AAD. Cells were gated based on the CD11c expression. **(A)** Histogram representative of an experiment showing the apoptosis of DCs induced by Fh12. **(B)** Average percentages and their SEM of at least three independent experiments showing that the percentage of DCs viable (V) compared to apoptotic (EA or LA) or necrotic cells (N) in untreated CD14 KO cells is significantly high (\* $p=0.144$ ) whereas the number of DCs in late apoptosis (LA) compared to viable (V) cells is significantly high (\*\*\* $p<0.0001$ ).

237

238 **Fh12 did not induce DCs classical maturation but affected LPS-induced DCs**  
239 **activation**

240 Having observed that after treatment with low Fh12 concentrations (2.5µg/ml) near 52%  
241 of DCs still remain viable, we investigated whether at this experimental conditions Fh12  
242 could modify the activation status of LPS-activated DCs. The cytokines and the  
243 expression of surface proteins involved in the T-cell activation and polarization were  
244 analyzed in DCs cultured with medium alone, Fh12 (2.5µg/ml), LPS (1µg/ml) or for 1h  
245 with Fh12 and further stimulated with LPS. As expected, DCs stimulated with LPS  
246 produced significantly more IL-12p70 ( $p=0.0006$ ) and IL-6 ( $p=0.0003$ ) than untreated  
247 DCs and did not produce IL-10. However, although Fh12 alone did not induce the  
248 production of IL-12p70, IL-6, or IL-10, it significantly suppressed the LPS-induced IL-

249 IL-12p70 ( $p < 0.031$ ) and IL-6 ( $p < 0.0458$ ) production. In addition, in the presence of Fh12,  
250 LPS-stimulated cells produced significantly more IL-10 ( $p = 0.0039$ ) than untreated cells  
251 (Fig. 4). Moreover, the expression of the MHC-II and co-stimulatory molecules CD40  
252 and CD80 induced by LPS-stimulation was found significantly downregulated by the  
253 Fh12 treatment ( $p = 0.0072$ ,  $p = 0.0023$ , and  $p = 0.0398$ , respectively) (Fig. 5). Together, our  
254 data showed that Fh12 was not able to induce classical DC maturation but exerted control  
255 over the DC activation induced by LPS. These not only by virtue of its ability to inhibit  
256 expression of co-stimulatory molecules essential for T-cell activation, but also by directly  
257 suppressing the secretion of cytokines critical for the Th1 cell polarization.

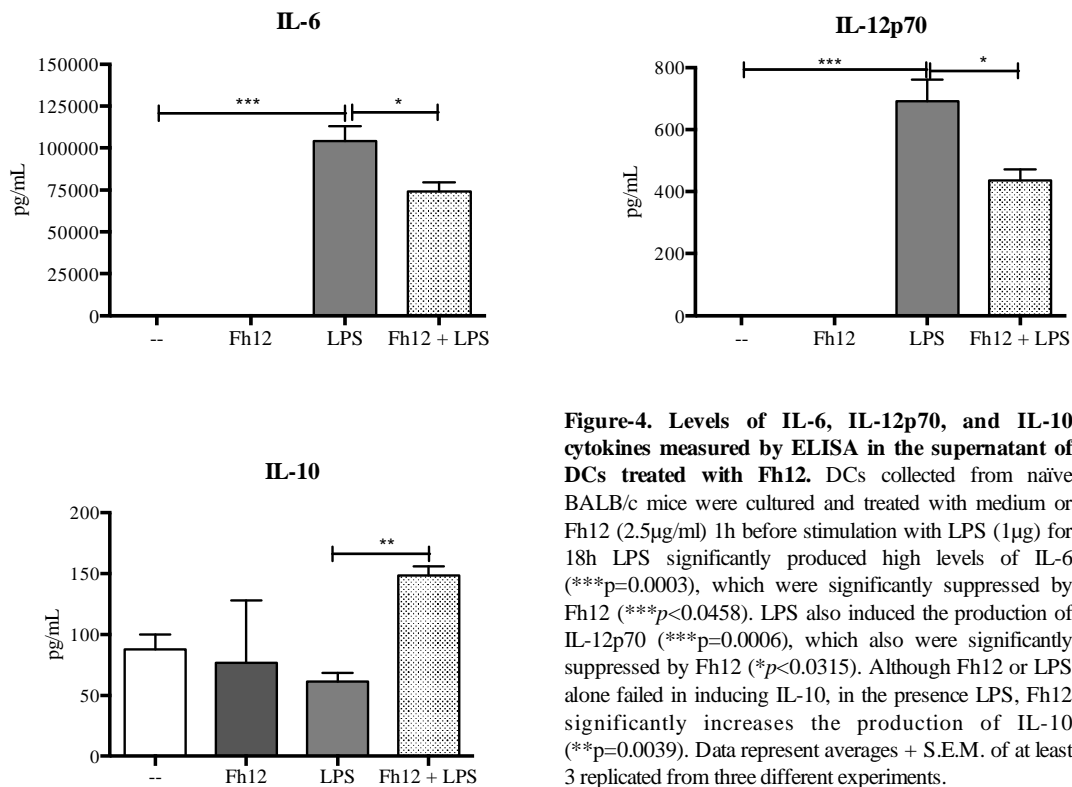

**Figure-4. Levels of IL-6, IL-12p70, and IL-10 cytokines measured by ELISA in the supernatant of DCs treated with Fh12.** DCs collected from naïve BALB/c mice were cultured and treated with medium or Fh12 (2.5µg/ml) 1h before stimulation with LPS (1µg) for 18h. LPS significantly produced high levels of IL-6 ( $***p = 0.0003$ ), which were significantly suppressed by Fh12 ( $***p < 0.0458$ ). LPS also induced the production of IL-12p70 ( $***p = 0.0006$ ), which also were significantly suppressed by Fh12 ( $*p < 0.0315$ ). Although Fh12 or LPS alone failed in inducing IL-10, in the presence LPS, Fh12 significantly increases the production of IL-10 ( $***p = 0.0039$ ). Data represent averages + S.E.M. of at least 3 replicated from three different experiments.

258

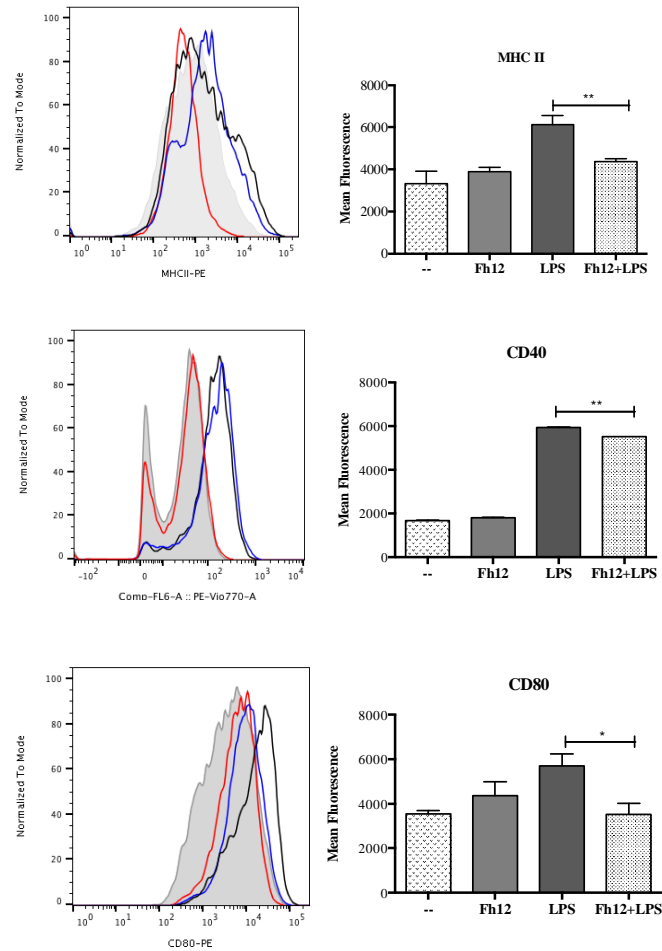

**Figure 5. Fh12 inhibits MHC II and co-stimulatory molecules expression on LPS-activated DCs.** DCs from BALB/c mice were treated for 1h with Fh12 (2.5 µg/ml) and further stimulated with LPS (1µg) for 18h. After incubation, the cells were harvested and analyzed by two-color flow cytometry for MHC-II, CD40 and CD80. Cells were gated based on the expression of CD11c. Histograms (left panel) show LPS-stimulated cells (black line), Fh12-treated cells (red line), Fh12+LPS-stimulated cells (blue line) and untreated cells (--) (gray shaded histogram). Right panel represents mean fluorescence intensity of untreated DCs or treated with Fh12, LPS or Fh12/LPS, for MHC-II, CD40 and CD80, respectively (\*\* $p=0.0072$ , \*\* $p=0.0023$ , \* $p=0.0398$ ).

259

## 260 **Fh12-treated DCs showed reduced ability to induce allogeneic responses**

261 Given our data showing that Fh12 inhibits the maturation of LPS-treated DCs, we  
262 reasoned that the ability of these cells to prime allospecific T-cell responses could be  
263 impaired. Then, we wanted to determine which T helper profile was promoted by Fh12-  
264 treated DCs in a mixed lymphocyte reaction. To this end, immature or LPS-treated DCs

265 or treated for 1h with Fh12 and further stimulated with LPS from BALB/c mice were  
266 then cultured with allogeneic splenocytes from C57BL6. Cultures with untreated DCs  
267 were used as control. As expected, DCs stimulated with LPS and co-cultured with  
268 allogeneic splenocytes induced the secretion of significantly higher amounts of IFN- $\gamma$   
269 ( $p=0.0003$ ) compared to untreated cells and failed to induce allogeneic IL-4 or IL-13  
270 production. In contrast, Fh12-treated DCs induced significant amounts of IL-4  
271 ( $p=0.0022$ ) and IL-13 ( $p<0.0001$ ) compared to untreated cells. Importantly, LPS-  
272 stimulated DCs that were pre-treated with Fh12 and then co-cultured with allogeneic  
273 splenocytes lack the ability to induce INF- $\gamma$  production ( $p=0.0003$ ) whereas significantly  
274 augmented their capacity to produce IL-4 ( $p=0.0073$ ). Fh12 also showed a tendency to  
275 increase the production of IL-13 in DCs stimulated with LPS and then co-cultured with  
276 splenocytes, but these increases were not found significant (**Fig. 6**). These results suggest  
277 that Fh12 could be able to promote the activation of T-helper type-2 (Th2) responses of  
278 immature or LPS-mature DCs, whereas concurrently suppress the ability of these cells to  
279 promote the Th1-response.

280

281



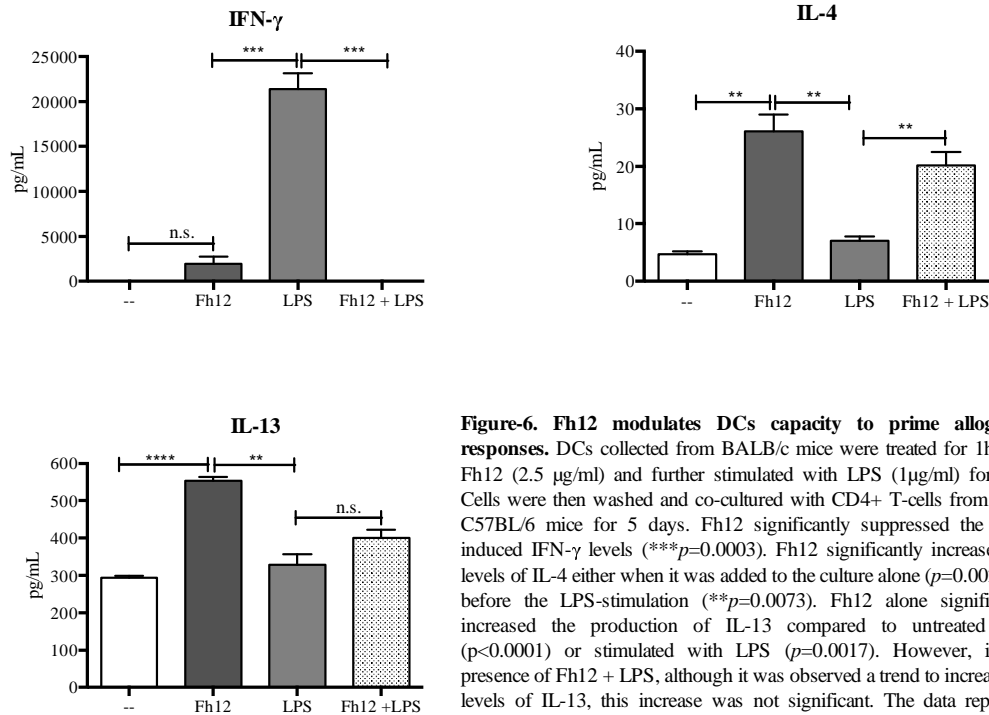

**Figure-6. Fh12 modulates DCs capacity to prime allogeneic responses.** DCs collected from BALB/c mice were treated for 1h with Fh12 (2.5  $\mu\text{g}/\text{ml}$ ) and further stimulated with LPS (1 $\mu\text{g}/\text{ml}$ ) for 18h. Cells were then washed and co-cultured with CD4<sup>+</sup> T-cells from naive C57BL/6 mice for 5 days. Fh12 significantly suppressed the LPS-induced IFN- $\gamma$  levels ( $***p=0.0003$ ). Fh12 significantly increased the levels of IL-4 either when it was added to the culture alone ( $p=0.0022$ ) or before the LPS-stimulation ( $**p=0.0073$ ). Fh12 alone significantly increased the production of IL-13 compared to untreated cells ( $p<0.0001$ ) or stimulated with LPS ( $p=0.0017$ ). However, in the presence of Fh12 + LPS, although it was observed a trend to increase the levels of IL-13, this increase was not significant. The data represent averages with their SEM of at least 3 replicates from three independent experiments.

282  
283  
284  
285  
286

## DISCUSSION

287 *F. hepatica* can be considered a successful parasite because of its ability to migrate  
288 through the host tissues without suffering damage to finally allocate in the bile ducts,  
289 where it can survive for years. To achieve this survival, *F. hepatica* has co-evolved with  
290 the host and is able to induce a type of response that is not harmful to it. During its  
291 migration, the parasite excretes and/or secretes many products capable of modulating the  
292 immune response (Molina-Hernandez et al., 2015). Soon after the infection, the juvenile  
293 stage of *F. hepatica* crosses the intestinal wall and reaches the peritoneum inducing the  
294 recruitment of alternatively activated macrophages (Adams et al., 2014; Donnelly et al.,  
295 2005; Donnelly et al., 2008). Different reports have shown the ability of various products  
296 such as ESPs (Guasconi et al., 2011), and FhTeg (Hacariz et al., 2011) and different

297 enzymes such as thioredoxin peroxidase (Donnelly et al., 2005), 2-Cys peroxiredoxin  
298 (Donnelly et al., 2008), fatty acid binding protein (Fh12) (Figuroa-Santiago, 2014) and  
299 more recently heme-oxygenase-1 (Carasi et al., 2017) to modulate macrophage activation  
300 toward an alternative profile. This phenotype promotes the secretion of anti-inflammatory  
301 factors, enhancing the differentiation of Th2 and Treg cells (Kreider et al., 2007). In  
302 addition to the modulation of macrophages activation, *F. hepatica* derived products such  
303 as ESPs (Falcon et al., 2010), FhTeg (Hamilton et al., 2009) and secreted proteins such as  
304 Kunitz type molecule (KTM) (Falcon et al., 2014) has been related to a down-modulation  
305 in DCs activation. It is reasonable to assume that distinct molecules, secreted or  
306 expressed by the parasite in its tegument, may participate during its migration in the  
307 prevention of an appropriate activation of DCs, contributing to an anti-inflammatory  
308 control.

309 Given that Fh12 is an immunogenic protein that plays an important role in nutrient  
310 acquisition and survival of the parasite and is present in ESPs and FhTeg, its interaction  
311 with DCs might be relevant. In this work, we investigate the effect of Fh12 on maturation  
312 and function of DCs. Unexpectedly, our results showed that Fh12 induces the early and  
313 late apoptosis of DCs in a dose dependent manner. Additionally, Fh12 inhibited the  
314 ability of DCs to mature in the presence of LPS. Considering that Fh12 inhibits  
315 inflammatory cytokines in LPS matured macrophages through a mechanism that involves  
316 CD14, we hypothesize that this molecule might be involved in the apoptosis. However,  
317 our results are against this hypothesis since DCs from CD14 deficient mice in the  
318 presence of Fh12 showed similar apoptosis levels of those observed in DCs from normal  
319 animals, suggesting the independence of this phenomenon from CD14.

320 Being a CD14 a coreceptor that participates along with the toll-like receptor-4 (TLR4)  
321 and MD-2 in the recognition of bacterial LPS (Dowling, 2018; Kitchens, 2000) its  
322 importance in the recognition of Fh12 by DCs seems to be relative. In contrast, it has  
323 been shown that CD14 is involved in the apoptotic death of LPS-stimulated DCs via  
324 NFAT activation has been demonstrated (Zanoni et al., 2011). However, unlike what  
325 happens with DCs, macrophages do not die after LPS activation. The authors argue that  
326 after activation by LPS, significant differences are generated in the signal transduction  
327 pathways in DCs and macrophages. These last cells were unable to mobilize Ca, a crucial  
328 event to induce apoptosis. Interestingly tissue-resident macrophage survival after  
329 activation is a crucial event for inflammation resolution (Zanoni et al., 2009).

330 Interestingly, in previous reports, the induction of apoptosis in eosinophils by ES  
331 products of *F. hepatica* through the induction of reactive oxygen species (ROS) has been  
332 shown (Serradell et al., 2007). Since Fh12 is part of the *F. hepatica* ESPs, a similar  
333 mechanism of apoptosis induced by Fh12 in DCs might be occurring. Experiments using  
334 ROS inhibitors or other apoptosis mediators should be used to dissect the mechanism by  
335 which Fh12 exerts this effect on DCs.

336 Based on our results showing that the lowest concentration of Fh12 induce approximately  
337 47% of the cells in apoptosis, while low concentration of LPS (100ng/ml) induced only  
338 17.5% of the apoptotic cells (**Fig. 2S**) and both stimuli induce different activation status  
339 in DCs, we hypothesize that the apoptosis and the modulation of DCs activation might be  
340 independent events. Data supporting this notion show that the signaling involved in  
341 survival and LPS-induced activation in DCs would be different, dependent on ERK and  
342 NF- $\kappa$ B, respectively (Rescigno et al., 1998). Both phenomena could occur simultaneously,

343 and it would be difficult to determine whether they are dependent or independent events.  
344 During the allogenic responses, a mismatch between the MHC-II molecules presents in  
345 the DCs and the TCR on T lymphocytes promotes the proliferation and production of  
346 cytokines, mainly IFN- $\gamma$ . This phenomenon is exacerbated when the microenvironment  
347 generated during DCs stimulation is inflammatory (Herrera et al., 2004). Our results  
348 indicate that Fh12 exerts a negative regulation on DCs maturation induced by LPS  
349 inhibiting MHCII and co-stimulatory expression generating defective activated DCs with  
350 low production of proinflammatory molecules or cytokines. The poor maturation status of  
351 DCs might explain the impaired ability of these cells to induce allogeneic responses. This  
352 effect exerted by Fh12 does not appear to be redundant since other molecules derived  
353 from *F. hepatica* such as cathepsin L1 or glutathione S-transferase inhibit IL-23 secretion  
354 from LPS-matured DCs, with the consequence of a reduction in the inflammatory Th17  
355 response. Taken together, these results suggest that different antigens derived from *F.*  
356 *hepatica* might attenuate the DCs activation, which in turn is responsible for the decrease  
357 of both type Th1 and Th17 inflammatory responses, what otherwise it would be harmful  
358 to the parasite. The control of DCs activation, together with the apoptosis of these cells,  
359 might be useful to reduce the impact of bacterial ligands translocation during the larvae  
360 passage through the intestinal wall. Thus, our data suggest an immunomodulatory role for  
361 Fh12 on DCs function and its possible involvement in immunoevasion mechanisms.

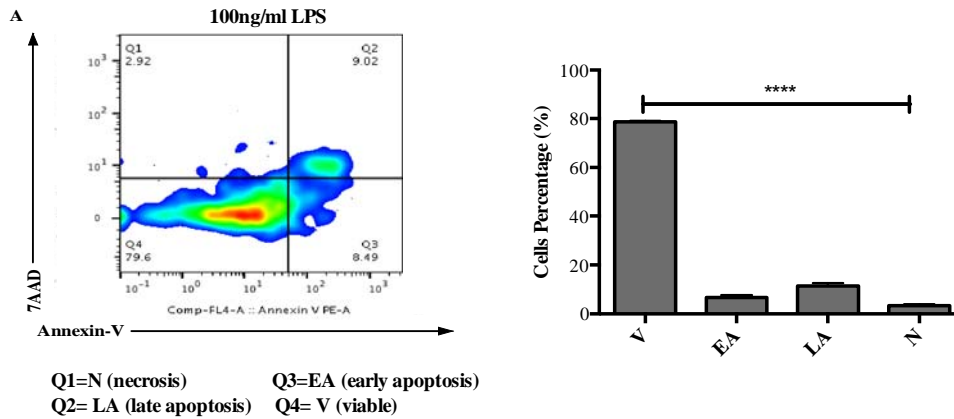

**Figure-2S. LPS does not promote significant apoptosis to DCs.** Myeloid DCs from C57BL/6 mice were treated with LPS (100ng/ml) or remain untreated for 18 hours. After incubation, the cells were harvested and analyzed by two-color flow cytometry for Annexin V and 7-AAD. Cells were gated based on the CD11c expression. (A) Histogram representative of an experiment showing that at this experimental conditions most of cells (79.6%) remain viable and that only the 17% of cells are apoptotic. (B) Average percentages and their SEM of at least three independent experiments showing that the percentage of DCs viable (V) at LPS concentration of 100ng/ml is significantly high (\*\*\*\* $p < 0.0001$ ) compared to the percentage of cells in early (EA) or late apoptosis (LA).

362

## 363 ACKNOWLEDGMENTS

364 This work was supported by a grant from the National Institute of Allergy and Infectious  
365 Diseases (NIAID) 1SC1AI155439-01 and grants from the National Institutes on Minority  
366 Health Disparities G12MD007600, R25GM061838 and 5R25GM061151. The contents  
367 of this article are solely the responsibility of the authors and do not necessarily represent  
368 the official views of the National Institutes of Health.

369

370 **REFERENCES**

371

372 Adam-Klages, S., Adam, D., Janssen, O., Kabelitz, D., 2005. Death receptors and  
373 caspases: role in lymphocyte proliferation, cell death, and autoimmunity.  
374 Immunol. Res. 33, 149-166.

375 Adams, P.N., Aldridge, A., Vukman, K.V., Donnelly, S., O'Neill, S.M., 2014. *Fasciola*  
376 *hepatica* tegumental antigens indirectly induce an M2 macrophage-like  
377 phenotype in vivo. Parasite Immunol. 36, 531-539.

378 Anuracpreeda, P., Wanichanon, C., Chaithirayanon, K., Preyavichyapugdee, N., Sobhon,  
379 P., 2006. Distribution of 28.5 kDa antigen in the tegument of adult *Fasciola*  
380 *gigantica*. Acta Trop. 100, 31-40.

381 Ardestani, S.K., Poorrajab, F., Razmi, S., Foroumadi, A., Ajdary, S., Gharegozlou, B.,  
382 Behrouzi-Fardmoghadam, M., Shafiee, A., 2012. Cell death features induced in  
383 *Leishmania major* by 1,3,4-thiadiazole derivatives. Exp. Parasitol. 132, 116-122.

384 Brady, M.T., O'Neill, S.M., Dalton, J.P., Mills, K.H., 1999. *Fasciola hepatica*  
385 suppresses a protective Th1 response against *Bordetella pertussis*. Inf. and Immu.  
386 67, 5372-5378.

387 Carasi, P., Rodriguez, E., da Costa, V., Frigerio, S., Brossard, N., Noya, V., Robello, C.,  
388 Anegon, I., Freire, T., 2017. Heme-Oxygenase-1 Expression Contributes to the  
389 Immunoregulation Induced by *Fasciola hepatica* and Promotes Infection.  
390 Frontiers Immunol. 8, 883.

391 Donnelly, S., O'Neill, S.M., Sekiya, M., Mulcahy, G., Dalton, J.P., 2005. Thioredoxin  
392 peroxidase secreted by *Fasciola hepatica* induces the alternative activation of  
393 macrophages. Inf. Immu. 73, 166-173.

394 Donnelly, S., Stack, C.M., O'Neill, S.M., Sayed, A.A., Williams, D.L., Dalton, J.P.,  
395 2008. Helminth 2-Cys peroxiredoxin drives Th2 responses through a mechanism  
396 involving alternatively activated macrophages. FASEB J. 22, 4022-4032.

397 Dowling, D.J., 2018. Recent Advances in the Discovery and Delivery of TLR7/8  
398 Agonists as Vaccine Adjuvants. Immuno Horizons 2, 185-197.

399 Espino, A.M., Rodriguez Medina, J.R., Hillyer, G.V., 2001. Isolation and  
400 immunological characterization of fatty acid binding protein isoforms from  
401 *Fasciola hepatica*. J. Parasitol. 87, 1028-1033.

402 Falcon, C., Carranza, F., Martinez, F.F., Knubel, C.P., Masih, D.T., Motran, C.C., Cervi,  
403 L., 2010. Excretory-secretory products (ESP) from *Fasciola hepatica* induce  
404 tolerogenic properties in myeloid dendritic cells. Vet. Immunol. Immunopathol.  
405 137, 36-46.

406 Falcon, C.R., Masih, D., Gatti, G., Sanchez, M.C., Motran, C.C., Cervi, L., 2014.  
407 *Fasciola hepatica* Kunitz type molecule decreases dendritic cell activation and  
408 their ability to induce inflammatory responses. PLoS One 9, e114505.

409 Figueroa-Santiago, O., Espino A.M. 2014. , 2014. *Fasciola hepatica* Fatty Acid Binding  
410 Protein Induces the Alternative Activation of Human Macrophages. Inf. Immu.  
411 82, 5005-5012.

412 Flynn, R.J., Irwin, J.A., Olivier, M., Sekiya, M., Dalton, J.P., Mulcahy, G., 2007.  
413 Alternative activation of ruminant macrophages by *Fasciola hepatica*. Vet.  
414 Immunol. Immunopathol. 120, 31-40.

- 415 Frey, E.A., Finlay, B.B., 1998. Lipopolysaccharide induces apoptosis in a bovine  
416 endothelial cell line via a soluble CD14 dependent pathway. *Microbial Pathog.*  
417 24, 101-109.
- 418 Guasconi, L., Serradell, M.C., Garro, A.P., Iacobelli, L., Masih, D.T., 2011. C-type  
419 lectins on macrophages participate in the immunomodulatory response to  
420 *Fasciola hepatica* products. *Immunol.* 133, 386-396.
- 421 Guasconi, L., Serradell, M.C., Masih, D.T., 2012. *Fasciola hepatica* products induce  
422 apoptosis of peritoneal macrophages. *Vet. Immunolo. Immunopathol.* 148, 359-  
423 363.
- 424 Hacariz, O., Sayers, G., Baykal, A.T., 2012. A proteomic approach to investigate the  
425 distribution and abundance of surface and internal *Fasciola hepatica* proteins  
426 during the chronic stage of natural liver fluke infection in cattle. *J. Proteome Res.*  
427 11, 3592-3604.
- 428 Hacariz, O., Sayers, G., Mulcahy, G., 2011. A preliminary study to understand the effect  
429 of *Fasciola hepatica* tegument on naive macrophages and humoral responses in  
430 an ovine model. *Vet. Immunol. Immunopathol.* 139, 245-249.
- 431 Hamilton, C.M., Dowling, D.J., Loscher, C.E., Morphew, R.M., Brophy, P.M., O'Neill,  
432 S.M., 2009. The *Fasciola hepatica* tegumental antigen suppresses dendritic cell  
433 maturation and function. *Inf. Immu.* 77, 2488-2498.
- 434 Heidenreich, S., Schmidt, M., August, C., Cullen, P., Rademaekers, A., Pauels, H.G.,  
435 1997. Regulation of human monocyte apoptosis by the CD14 molecule. *J.*  
436 *Immunol.* 159, 3178-3188.
- 437 Herrera, O.B., Golshayan, D., Tibbott, R., Salcido Ochoa, F., James, M.J., Marelli-Berg,  
438 F.M., Lechler, R.I., 2004. A novel pathway of alloantigen presentation by  
439 dendritic cells. *J. Immunol.* 173, 4828-4837.
- 440 Kitchens, R.L., 2000. Role of CD14 in cellular recognition of bacterial  
441 lipopolysaccharides. *Chem. Immunol.* 74, 61-82.
- 442 Kreider, T., Anthony, R.M., Urban, J.F., Jr., Gause, W.C., 2007. Alternatively activated  
443 macrophages in helminth infections. *Curr. Opin. Immunol.* 19, 448-453.
- 444 Martin, I., Caban-Hernandez, K., Figueroa-Santiago, O., Espino, A.M., 2015. *Fasciola*  
445 *hepatica* fatty acid binding protein inhibits TLR4 activation and suppresses the  
446 inflammatory cytokines induced by lipopolysaccharide in vitro and in vivo. *J*  
447 *Immunol.* 194, 3924-3936.
- 448 Mas-Coma, S., Bargues, M.D., Valero, M.A., 2005. Fascioliasis and other plant-borne  
449 trematode zoonoses. *Int. J. Parasitol.* 35, 1255-1278.
- 450 Molina-Hernandez, V., Mulcahy, G., Perez, J., Martinez-Moreno, A., Donnelly, S.,  
451 O'Neill, S.M., Dalton, J.P., Cwiklinski, K., 2015. *Fasciola hepatica* vaccine: we  
452 may not be there yet but we're on the right road. *Vet. Parasitol.* 208, 101-111.
- 453 Morales, A., Espino, A.M., 2012. Evaluation and characterization of *Fasciola hepatica*  
454 tegument protein extract for serodiagnosis of human fascioliasis. *Clin. Vaccine*  
455 *Immunol.* 19, 1870-1878.
- 456 Morphew, R.M., Eccleston, N., Wilkinson, T.J., McGarry, J., Perally, S., Prescott, M.,  
457 Ward, D., Williams, D., Paterson, S., Raman, M., Ravikumar, G., Khalid  
458 Saifullah, M., Abbas Abidi, S.M., McVeigh, P., Maule, A.G., Brophy, P.M.,  
459 LaCourse, E.J., 2012. Proteomics and in silico approaches to extend



460 understanding of the glutathione transferase superfamily of the tropical liver  
461 fluke *Fasciola gigantica*. *J. Proteome Res.* 11, 5876-5889.  
462 O'Neill, S.M., Mills, K.H., Dalton, J.P., 2001. *Fasciola hepatica* cathepsin L cysteine  
463 proteinase suppresses *Bordetella pertussis*-specific interferon-gamma production  
464 in vivo. *Parasite Immunol.* 23, 541-547.  
465 Ramos-Benitez, M.J., Ruiz-Jimenez, C., Aguayo, V., Espino, A.M., 2017. Recombinant  
466 *Fasciola hepatica* fatty acid binding protein suppresses toll-like receptor  
467 stimulation in response to multiple bacterial ligands. *Sci. Rep.* 7, 5455.  
468 Rescigno, M., Martino, M., Sutherland, C.L., Gold, M.R., Ricciardi-Castagnoli, P., 1998.  
469 Dendritic cell survival and maturation are regulated by different signaling  
470 pathways. *J. Exp. Med.* 188, 2175-2180.  
471 Serradell, M.C., Guasconi, L., Cervi, L., Chiapello, L.S., Masih, D.T., 2007. Excretory-  
472 secretory products from *Fasciola hepatica* induce eosinophil apoptosis by a  
473 caspase-dependent mechanism. *Vet. Immunol. Immunopathol.* 117, 197-208.  
474 Wilson, R.A., Wright, J.M., de Castro-Borges, W., Parker-Manuel, S.J., Dowle, A.A.,  
475 Ashton, P.D., Young, N.D., Gasser, R.B., Spithill, T.W., 2011. Exploring the  
476 *Fasciola hepatica* tegument proteome. *Int. J. Parasitol.* 41, 1347-1359.  
477 Zanoni, I., Ostuni, R., Capuano, G., Collini, M., Caccia, M., Ronchi, A.E., Rocchetti, M.,  
478 Mingozzi, F., Foti, M., Chirico, G., Costa, B., Zaza, A., Ricciardi-Castagnoli, P.,  
479 Granucci, F., 2009. CD14 regulates the dendritic cell life cycle after LPS  
480 exposure through NFAT activation. *Nature* 460, 264-268.  
481 Zanoni, I., Ostuni, R., Marek, L.R., Barresi, S., Barbalat, R., Barton, G.M., Granucci, F.,  
482 Kagan, J.C., 2011. CD14 controls the LPS-induced endocytosis of Toll-like  
483 receptor 4. *Cell* 147, 868-880.  
484

485

486

487

488

489

490

491

492

493

494



495

496

497

498 **LEGENDS OF FIGURES**

499

500

501 **Figure-1. MTT-viability assay of Fh12 treated DCs.** Murine DCs were seeded into 96-  
502 wells plates at  $4 \times 10^5$  cells in complete RPMI plus 20ng/ml GM-CSF and then treated  
503 with Fh12 (2.5, 5, 10, 15 $\mu$ g/ml) in the presence or absence of 1 $\mu$ g/ml LPS (*E. coli*  
504 0111:B4). Control cells were treated with Fh12 or LPS alone. After 18h of incubation at  
505 37°C, 5% CO<sub>2</sub> 50 $\mu$ l MTT (sodium 3'-[1-(phenylaminocarbonyl)-3,4-tetrazolium]-bis (4-  
506 methoxy-6-nitro) benzene sulfonic acid hydrate) labeling reagent was added to each well  
507 and the absorbance was read at 480 nm. Viability of cells significantly dropped (\*\*\*\*  
508  $p < 0.0001$ ) at Fh12 concentrations  $\geq 10 \mu$ g/ml.

509

510 **Figure-2. Fh12 induces apoptosis of DCs, as measured by Annexin-V binding to**  
511 **externalized phosphatidylserine.** Myeloid DCs from C57BL/6 mice were treated with  
512 Fh12 (2.5, 5, 10, and 15  $\mu$ g/ml) or remain untreated for 18 hours. After incubation, the cells  
513 were harvested and analyzed by two-color flow cytometry for Annexin V and 7-AAD. Cells  
514 were gated based on the CD11c expression. **(A)** Histogram representative of an experiment  
515 showing that the apoptosis of DCs induced by Fh12 is dose-dependent. **(B)** Average  
516 percentages and their SEM of at least three independent experiments showing that the  
517 percentage of DCs viable (V) at Fh12 concentration of 2.5 $\mu$ g/ml is significantly high  
518 (\*\*\*\* $p < 0.0001$ ) compared to the percentage of cells in early (EA) or late apoptosis (LA). In  
519 contrast, the percentage of DCs in apoptosis significantly increased at Fh12 concentration of  
520 10 $\mu$ g/ml. (\* $p = 0.0146$ ) and 15 $\mu$ g/ml (\*\* $p < 0.0008$ ).

521

522 **Figure-3. Fh12 induces apoptosis of DCs in absence of CD14 coreceptor.** Myeloid DCs  
523 from CD14 KO C57BL/6 mice were treated with Fh12 (15µg/ml) for 18 hours or remain  
524 untreated. After incubation, the cells were harvested and analyzed by two-color flow  
525 cytometry for Annexin V and 7-AAD. Cells were gated based on the CD11c expression. (A)  
526 Histogram representative of an experiment showing the apoptosis of DCs induced by Fh12.  
527 (B) Average percentages and their SEM of at least three independent experiments showing  
528 that the percentage of DCs viable (V) compared to apoptotic (EA or LA) or necrotic cells (N)  
529 in untreated CD14 KO cells is significantly high ( $*p=0.144$ ) whereas the number of DCs in  
530 late apoptosis (LA) compared to viable (V) cells is significantly high ( $****p<0.0001$ ).

531

532 **Figure-4. Levels of IL-6, IL-12p70, and IL-10 cytokines measured by ELISA in the**  
533 **supernatant of DCs treated with Fh12.** DCs collected from naïve BALB/c mice were  
534 cultured and treated with medium or Fh12 (2.5µg/ml) 1h before stimulation with LPS (1µg)  
535 for 18h LPS significantly produced high levels of IL-6 ( $***p=0.0003$ ), which were  
536 significantly suppressed by Fh12 ( $***p<0.0458$ ). LPS also induced the production of IL-  
537 12p70 ( $***p=0.0006$ ), which also were significantly suppressed by Fh12 ( $*p<0.0315$ ).  
538 Although Fh12 or LPS alone failed in inducing IL-10, in the presence LPS, Fh12  
539 significantly increases the production of IL-10 ( $**p=0.0039$ ). Data represent averages +  
540 S.E.M. of at least 3 replicated from three different experiments.

541

542 **Figure-5. Fh12 inhibits MHC II and co-stimulatory molecules expression on LPS-**  
543 **activated DCs.** DCs from BALB/c mice were treated for 1h with Fh12 (2.5 µg/ml) and  
544 further stimulated with LPS (1µg) for 18h. After incubation, the cells were harvested and

545 analyzed by two-color flow cytometry for MHC-II, CD40 and CD80. Cells were gated based  
546 on the expression of CD11c. Histograms (left panel) show LPS-stimulated cells (black line),  
547 Fh12-treated cells (red line), Fh12+LPS-stimulated cells (blue line) and untreated cells (--)  
548 (gray shaded histogram). Right panel represents mean fluorescence intensity of untreated  
549 DCs or treated with Fh12, LPS or Fh12/LPS, for MHC-II, CD40 and CD80, respectively  
550 (\*\* $p=0.0072$ , \*\* $p=0.0023$ , \* $p=0.0398$ ).

551

552 **Figure-6. Fh12 modulates DCs capacity to prime allogeneic responses.** DCs collected  
553 from BALB/c mice were treated for 1h with Fh12 (2.5  $\mu\text{g/ml}$ ) and further stimulated with  
554 LPS (1 $\mu\text{g/ml}$ ) for 18h. Cells were then washed and co-cultured with CD4+ T-cells from  
555 naïve C57BL/6 mice for 5 days. Fh12 significantly suppressed the LPS-induced IFN- $\gamma$  levels  
556 (\*\*\* $p=0.0003$ ). Fh12 significantly increased the levels of IL-4 either when it was added to  
557 the culture alone ( $p=0.0022$ ) or before the LPS-stimulation (\*\* $p=0.0073$ ). Fh12 alone  
558 significantly increased the production of IL-13 compared to untreated cells ( $p<0.0001$ ) or  
559 stimulated with LPS ( $p=0.0017$ ). However, in the presence of Fh12 + LPS, although it was  
560 observed a trend to increase the levels of IL-13, this increase was not significant. The data  
561 represent averages with their SEM of at least 3 replicates from three independent experiments.

562

563

564 **Figure-1S. Purification of native *F. hepatica* fatty acid binding protein (Fh12).** (A) *F. hepatica*  
565 whole worm extract was loaded onto a gel filtration chromatography with Sephadex G-50 (XK 26/100  
566 column). Fractions eluted in peak-2 (P2) containing proteins among 1.5 to 30kDa were pooled. (B-C)  
567 P2 was dialyzed against 1% glycine containing 2% ampholytes pH 3-10 (first run) or pH 5-7 (second  
568 run) and then loaded onto a liquid isoelectric focusing system (Rotofor, Bio-Rad). Individual fractions

569 were harvested and their pH and absorbance at 280nm were measured. Red lines on figures indicate  
570 fractions that were selected for pooling and subsequent purification step. **(D)** Fractions 3 to 11 from the  
571 IEF run with pH 5-7, which contain proteins with  $I_p$  between 4.61 to 5.9 were analyzed by 15% SDS-  
572 PAGE stained with silver stain to corroborate the presence of polypeptide of 12kDa. **(E)** Fractions 3 to  
573 11 containing the 12kDa polypeptide were pooled, dialyzed against PBS, concentrated to 1mg/ml and  
574 reanalyzed by SDS-PAGE (line-1) and western-blot (line-2) using a specific rabbit polyclonal antibody  
575 against Fh12 (17). **(F)** Polypeptide band was excised from gel and analyzed by matrix-assisted laser  
576 desorption ionization 9MALDI) and tandem mass spectrometry (MS/MS). Analysis revealed the  
577 presence of fatty acid binding protein.

578

579 **Figure-2S. LPS does not promote significant apoptosis to DCs.** Myeloid DCs from C57BL/6 mice  
580 were treated with LPS (100ng/ml) or remain untreated for 18 hours. After incubation, the cells were  
581 harvested and analyzed by two-color flow cytometry for Annexin V and 7-AAD. Cells were gated  
582 based on the CD11c expression. **(A)** Histogram representative of an experiment showing that at this  
583 experimental conditions most of cells (79.6%) remain viable and that only the 17% of cells are  
584 apoptotic. **(B)** Average percentages and their SEM of at least three independent experiments showing  
585 that the percentage of DCs viable (V) at LPS concentration of 100ng/ml is significantly high  
586 (\*\*\*\* $p < 0.0001$ ) compared to the percentage of cells in early (EA) or late apoptosis (LA).
